# Supplementary material
Source: publisher site journal article supplement (https://www.dovepress.com/article/586009)
Supplement: Supplementary file 1 [file 586009-%20Supplementary%20Table%20S1_1.docx]

Table S1_Table of Identified Chemical Constituents in Bu-Fei Formula

| Metabolite | Retention time | Mode | Adducts | Formula | Classification |
| --- | --- | --- | --- | --- | --- |
| 5-hydroxymethyl-2-furancarboxylic acid | 0.417183333 | pos | M+H | C6H6O4 | Others |
| N-Methylanthranilic Acid | 0.417183333 | pos | M+H | C8H9NO2 | Phenolic acids and derivatives |
| 1,4-diaminobutane | 0.480433333 | pos | M+H | C4H12N2 | Others |
| L-ornithine | 0.501216667 | pos | M+H | C5H12N2O2 | Amino acids and derivatives |
| D-lysine | 0.501216667 | pos | M+H | C6H14N2O2 | Amino acids and derivatives |
| Sarcosine | 0.611866667 | pos | M+H | C3H7NO2 | Amino acids and derivatives |
| Gamma-Aminobutyric Acid | 0.611866667 | pos | M+H | C4H9NO2 | Amino acids and derivatives |
| Creatinine | 0.611866667 | pos | M+H | C4H7N3O | Amino acids and derivatives |
| L-histidine | 0.611866667 | pos | M+H | C6H9N3O2 | Amino acids and derivatives |
| L-nmma | 0.611866667 | pos | M+H | C7H16N4O2 | Amino acids and derivatives |
| Ectoine | 0.629716667 | pos | M+H | C6H10N2O2 | Amino acids and derivatives |
| L-threonine | 0.647533333 | pos | M+H | C4H9NO3 | Amino acids and derivatives |
| 2-Furanmethanol | 0.665366667 | pos | M+H | C5H6O2 | Others |
| Phloroglucinol | 0.665366667 | pos | M+H | C6H6O3 | Phenolic acids and derivatives |
| Adenine | 0.665366667 | pos | M+H | C5H5N5 | Vitamins |
| Rhodiocyanoside A | 0.665366667 | pos | M+H | C11H17NO6 | Lipids |
| 4-hydroxyproline | 0.6832 | pos | M+H | C5H9NO3 | Amino acids and derivatives |
| Maltotetraose | 0.6832 | pos | M+NH4 | C24H42O21 | Carbohydrates and derivatives |
| 5-methylcytosine | 0.7011 | pos | M+H | C5H7N3O | Others |
| Phenacylamine | 0.7011 | pos | M+H | C8H9NO | Others |
| Piperidine | 0.718866667 | pos | M+H | C5H11N | Others |
| L-Glutamic acid | 0.718866667 | pos | M+H-H2O | C5H9NO4 | Amino acids and derivatives |
| Tyramine | 0.736666667 | pos | M+H-H2O | C8H11NO | Others |
| 4-Hydroxycinnamyl aldehyde | 0.736666667 | pos | M+H | C9H8O2 | Others |
| L-Phenylalanine | 0.736666667 | pos | M+H | C9H11NO2 | Amino acids and derivatives |
| Trans-Zeatin | 0.736666667 | pos | M+H | C10H13N5O | Others |
| 4-aminophenol | 0.809316667 | pos | M+H | C6H7NO | - |
| D-pyroglutamic acid | 0.93725 | pos | M+H | C5H7NO3 | Amino acids and derivatives |
| L-tyrosine | 0.955916667 | pos | M+H | C9H11NO3 | Amino acids and derivatives |
| 2-benzoxazolinone | 1.069083333 | pos | M+NH4 | C7H5NO2 | Others |
| 2-Pyrrolidinone | 1.088733333 | pos | M+H | C4H7NO | Others |
| Daphnetin | 1.210633333 | pos | M+H | C9H6O4 | Coumarins and derivatives |
| Serotonin | 1.333866667 | pos | M+H | C10H12N2O | Indoles and derivatives |
| 4-methyl-5-thiazoleethanol | 1.585116667 | pos | M+H | C6H9NOS | Others |
| 2,3-Butanediol | 1.730466667 | pos | M+H-H2O | C4H10O2 | Others |
| Coniine | 2.142583333 | pos | M+H | C8H17N | Alkaloids and derivatives |
| Carnosine | 2.204566667 | pos | M+H | C9H14N4O3 | Organic acids and derivatives |
| 2-amino-2-methyl-1,3-propanediol | 2.246316667 | pos | M+H-H2O | C4H11NO2 | Others |
| L-Noradrenaline | 2.287433333 | pos | M+H | C8H11NO3 | Others |
